# Supplementary material
Source: PubMed Central journal article supplement (PMC8934747)
Supplement: NIHMS1739834-supplement-supinfo1.pdf [file NIHMS1739834-supplement-supinfo1.pdf]

**To Drink or Not to Drink: When Drinking Intentions Predict Alcohol Consumption and  
Consequences**

**Sample 1 Background Measures**

How old are you?

17 18 19 20 21 22 23 24 25 26 27 28 29 30 31 or  
older

Are you male or female?

Male  Female

Which of these racial or ethnic groups describes you best?

White/European American  
 Black/African American  
 Latino/Hispanic American  
 Asian/Pacific Islander  
 Native American Indian/Native Alaskan  
 Other: \_\_\_\_\_

On how many days did you have a drink of alcohol in the past 30 days?

Pull down menu 0 – 30

**Sample 1 Daily Measures**

How many alcoholic drinks did you have with others/in a social setting **LAST NIGHT?** [1 drink equals one 12-oz. can or bottle of beer, one 5-oz. glass of wine, one 12-oz. wine cooler or 1-oz. of liquor straight or in a mixed drink]

0 1 2 3 4 5 6 7 8 9 10 11 12 13 14 15 >15

How many alcoholic drinks did you have alone/not interacting with others **LAST NIGHT?** [1 drink equals one 12-oz. can or bottle of beer, one 5-oz. glass of wine, one 12-oz. wine cooler or 1-oz. of liquor straight or in a mixed drink]

0 1 2 3 4 5 6 7 8 9 10 11 12 13 14 15 >15

How many people (including those listed above) were you with **LAST NIGHT?**

0 1 2 3 4 5 6 7 8 9 10 >10

Of those you were with **LAST NIGHT** who were drinking (if any), how many drinks did these people have on average? If no one you were with last night drank alcohol, please put zero.

0 1 2 3 4 5 6 7 8 9 10 11 12 13 14 15 >15 did not interact with others last night

Rate **TODAY'S** overall stressfulness.

*Not at all stressful* 1 2 3 4 5 6 *Extremely stressful* 7

Do you intend to drink alcohol **TONIGHT**?

*Not at all* 0 1 2 3 4 5 6 *Definitely* 7

### Sample 2 Background Measures

What is your current status?

- Still attending [university blinded]
- Graduated from [university blinded]
- Transferred to other undergraduate university
- Other

How old are you?

17 18 19 20 21 22 23 24 25 26 27 28 29 30 31 or older

Are you male or female?

Male  Female

Which of these racial or ethnic groups describes you best?

- White/European American
- Black/African American
- Latino/Hispanic American
- Asian/Pacific Islander
- Native American Indian/Native Alaskan
- Other: \_\_\_\_\_

**IN THE PAST 30 DAYS**, on how many occasions have you had a drink of alcohol?

Have not had a drink in the past 30 days 1-2 occasions 3-5 occasions 6-9 occasions 10-19 occasions 20-39 occasions 40 or more occasions

## Sample 2 Daily Measures

Did you do something **LAST NIGHT** that you regret?

\_\_\_\_\_Yes \_\_\_\_\_No

How many alcoholic drinks did you have **LAST NIGHT**? [1 drink equals one 12-oz. can or bottle of beer, one 5-oz. glass of wine, one 12-oz. wine cooler or 1.5-oz. of liquor straight or in a mixed drink]

0 1 2 3 4 5 6 7 8 9 10 11 12 13 14 15 >15

Were you with other people who were drinking **LAST NIGHT**?

\_\_\_\_\_Yes \_\_\_\_\_No

If yes, approximately how many other people were with you (or in your group)?

0 1 2 3 4 5 6 7 8 9 10 >10

If yes, how many drinks did others have on average?

0 1 2 3 4 5 6 7 8 9 10 11 12 13 14 15 >15

Please rate **TODAY'S** overall stressfulness by clicking the appropriate rating.

*Not at all  
stressful*

1

2

3

4

5

6

*Extremely  
stressful*

7

Do you intend to drink alcohol **TONIGHT**?

*Not at all*

0

1

2

3

4

5

6

*Definitely*

7
